# Supplementary material for: The solar photo-Fenton process at neutral pH applied to microcystin-LR degradation: Fe2+, H2O2 and reaction matrix effects
Source: Royal Society of Chemistry journal article supplement (doi:10.1039/d0pp00050g), 2020-06-12
Supplement: d0pp00050g1.pdf [file d0pp00050g1.pdf]

## Supplementary Material

### Solar photo-Fenton at neutral pH applied to microcystin-LR degradation: $\text{Fe}^{2+}$ , $\text{H}_2\text{O}_2$ and reactional matrix effects

Joicy Micheletto,<sup>a</sup> Mariana de Almeida Torres,<sup>b</sup> Vinícius de Carvalho S. de Paula,<sup>c</sup> Vânia Eloiza Cerutti,<sup>c</sup> Thomaz Aurélio Pagioro,<sup>c</sup> Quezia Bezerra Cass,<sup>d</sup> Lucia Regina R. Martins,<sup>c</sup> Marcus Vinicius de Liz<sup>c</sup> and Adriane Martins de Freitas<sup>\*c</sup>

<sup>a</sup> Laboratory of Minerals and Rocks Analysis (LAMIR), Department of Geology, Federal University of Paraná, Curitiba, Brazil

<sup>b</sup> Postgraduate Program in Pathophysiology and Toxicology, University of São Paulo, São Paulo, Brazil

<sup>c</sup> Department of Chemistry and Biology, Federal University of Technology - Paraná (UTFPR), Curitiba, Brazil.

\*Email: [adrianefreitas@utfpr.edu.br](mailto:adrianefreitas@utfpr.edu.br) (A. Freitas)

<sup>d</sup> Department of Chemistry, Federal University of São Carlos, São Carlos, São Paulo, Brazil.

† Current address: Rua Deputado Heitor Alencar Furtado, 5000, 81280-340, Curitiba, Paraná, Brazil.

**Table S1.** Composition of the matrix ASM-1.

| Substance                                            | Concentration (mg L <sup>-1</sup> ) |
|------------------------------------------------------|-------------------------------------|
| NaNO <sub>3</sub>                                    | 170.00                              |
| MgSO <sub>4</sub> ·7H <sub>2</sub> O                 | 49.00                               |
| MgCl <sub>2</sub> ·6H <sub>2</sub> O                 | 41.00                               |
| CaCl <sub>2</sub> ·2H <sub>2</sub> O                 | 29.00                               |
| KH <sub>2</sub> PO <sub>4</sub>                      | 43.50                               |
| Na <sub>2</sub> HPO <sub>4</sub> ·12H <sub>2</sub> O | 35.30                               |
| H <sub>3</sub> BO <sub>3</sub>                       | 2.80                                |
| MnCl <sub>2</sub> ·4H <sub>2</sub> O                 | 1.40                                |
| FeCl <sub>2</sub> ·6H <sub>2</sub> O                 | 0.91                                |
| ZnCl <sub>2</sub>                                    | 0.34                                |
| CoCl <sub>2</sub> ·6H <sub>2</sub> O                 | 0.019                               |
| CuCl <sub>2</sub> ·2H <sub>2</sub> O                 | 0.0014                              |
| EDTA Tritriplex                                      | 7.36                                |

pH adjusted to 7.4±0.1 with NaOH 0.1 mol L<sup>-1</sup> solution.

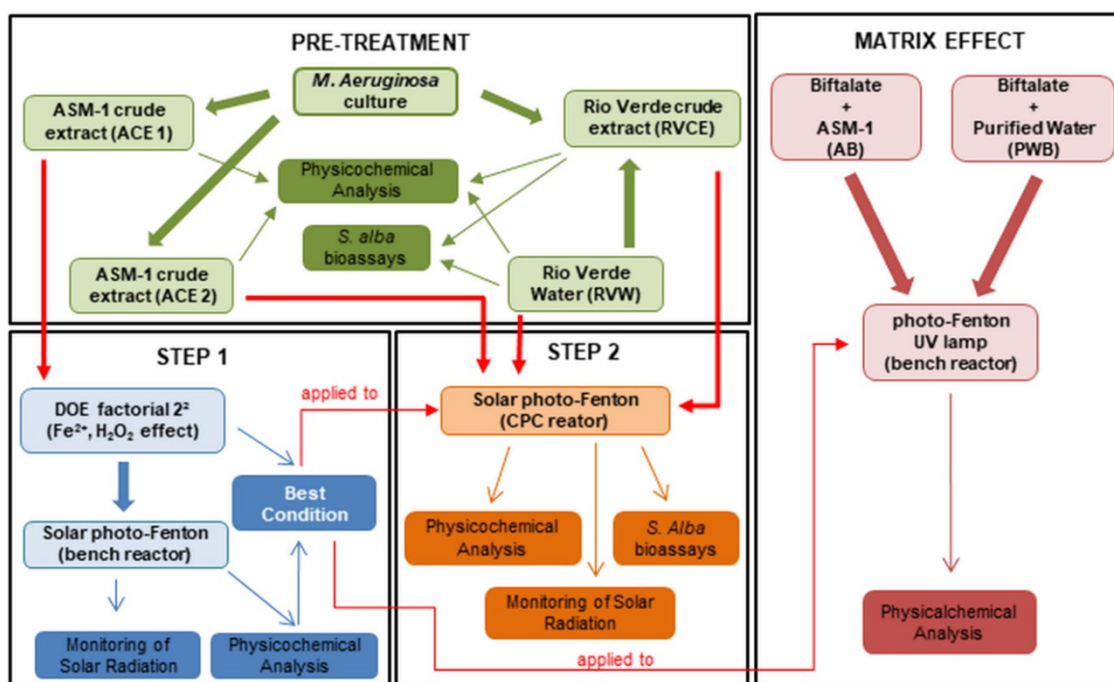

Fig. S2. Flowchart with general view about steps of works, samples used and monitoring of process.
